# Supplementary material
Source: publisher figshare collection journal article supplement (https://gsajournals.figshare.com/articles/dataset/_/8847728)
Supplement: Supplementary file 1 [file 1]

**Table S1: Oligonucleotides used in this study.**

| Primer Name                              | Reverse Primer | Description of Primer                                 | Sequence                                                  |
|------------------------------------------|----------------|-------------------------------------------------------|-----------------------------------------------------------|
| <b><i>unc-17p::llaC22:dsRed</i></b>      |                |                                                       |                                                           |
| oSJU30                                   | oSJU36         | Upstream of <i>unc-17</i>                             | CACCAATCATTTCTCCCCTCC                                     |
| oSJU31                                   | oSJU350        | Nested to oSJU30                                      | CATGACAAAGTGGTGACACTGG                                    |
| oSJU36                                   | oSJU30         | -1 to <i>unc-17b</i> and adds llaC22 tail             | TAGTCATAAGGCATCCGCGGGCCATCTTGTTTTAG<br>TAGGTTACTATTTTGAAC |
| oSJU37                                   | oSJU10         | llaC22 and adds <i>unc-17b</i> tail                   | TTGTTCAAATAGTAACCTACTAAAACAAGATGGC<br>CCGCGGATGCCTTATG    |
| <b><i>twk-16p::llaC22:dsRed</i></b>      |                |                                                       |                                                           |
| oSJU52                                   | oSJU50         | Upstream of <i>twk-16</i>                             | CTTTGTAAGCTATGACGTCACTTC                                  |
| oSJU53                                   | oSJU350        | Nested to oSJU52                                      | GACGTCACTTCTTAACAAACGG                                    |
| oSJU50                                   | oSJU52         | +6 to <i>twk-16</i> and adds llaC22 tail              | AGATAGTCATAAGGCATCCGCGGGCCATTGTGGT<br>ATCTGGAAGATGGATT    |
| oSJU51                                   | oSJU10         | llaC22 and adds <i>twk-16</i> tail                    | TTTGCAATCCATCTTCCAGATACCACAATGGCCCG<br>CGGATGCCTTATGAC    |
| <b><i>snb-1p::llaC22:dsRed</i></b>       |                |                                                       |                                                           |
| oSJU6                                    | oSJU8          | Upstream of <i>snb-1</i>                              | CTGTTTGTCATAAGTTTCAGCAG                                   |
| oSJU7                                    | oSJU350        | Nested to oSJU6                                       | GTTTCAGCAGGATGTTTCGGATG                                   |
| oSJU8                                    | oSJU6          | -1 to <i>snb-1</i> and adds llaC22 tail               | TAGTCATAAGGCATCCGCGGGCCATAGCGTCCAT<br>GTCGTCAAGATG        |
| oSJU9                                    | oSJU10         | llaC22 and adds <i>snb-1</i> tail                     | CATCTTGACGACATGGACGCTATGGCCCGCGGAT<br>GCCTTATG            |
| <b><i>twk-16(cs1)p::llaC22:dsRed</i></b> |                |                                                       |                                                           |
| oSJU199                                  | oSJU201        | <i>cs1</i> and adds <i>pes-10</i> basal promoter tail | AACGCTCGTAATTTGCAAAAAATCGATCGATGCTT<br>TGCAACAAGGCAA      |
| oSJU200                                  | oSJU204        | <i>pes-10</i> basal promoter and adds <i>cs1</i> tail | TCTTTTGCCTTGTTGCAAAGCATCGATCGATTTTT<br>TGCAAATTACGAG      |
| oSJU201                                  | oSJU199        | Upstream <i>cs1</i>                                   | GACTAAGCTGGCTAAGTTTGC                                     |
| oSJU202                                  | oSJU205        | Nested to 201                                         | GCTAAGTTTGCAAGTTCATC                                      |
| oSJU203                                  | oSJU206        | Nested to 202                                         | TTTGTGTTTTTTACACGGATC                                     |
| oSJU204                                  | oSJU200        | 3' of <i>pes-10</i>                                   | CAGACAAGAACTGTGGGAC                                       |
| oSJU205                                  | oSJU202        | Nested to 204                                         | AACACTGTGGGACAAGCTTTG                                     |
| oSJU206                                  | oSJU203        | <i>pes-10</i> basal promoter and adds llaC22          | ATAGTCATAAGGCATCCGCGGGCCATCTGAAAGTT                       |

|                             |         |                                                                       |                                                         |
|-----------------------------|---------|-----------------------------------------------------------------------|---------------------------------------------------------|
|                             |         | tail                                                                  | AAAAATTACAGTAT                                          |
| oSJU207                     | oSJU10  | IlaC22 and adds <i>pes-10</i> tail                                    | TTATACTGTAATTTTAACTTTTCAGATGCCCCGCGG<br>ATGCCTTATGAC    |
| <i>twk-16p:epac1-camps</i>  |         |                                                                       |                                                         |
| oSJU348                     | oSJU357 | 5' of <i>twk-16</i> and adds a NarI site                              | AATTGGTACCTGTGGTATCTGGAAGATGGATTG                       |
| oSJU357                     | oSJU348 | +1 to <i>twk-16</i> and adds a KpnI site                              | TATATGGCGCCCTTTGTAAGCTATGACGTCACTTC                     |
| <i>unc-17p:epac1-camps</i>  |         |                                                                       |                                                         |
| oSJU166                     | oSJU167 | 5' of <i>unc-17</i> and adds a bglII site                             | TATAAGATCTCATGACAAAGTGGTGACACTGG                        |
| oSJU167                     | oSJU166 | +1 to <i>unc-17b</i> and adds a PvuI site                             | TATACGATCGCTTGTTTTAGTAGGTTACTATTTTG                     |
| oSJU132                     | oSJU133 | 5' of <i>unc-54</i> 3'UTR and adds XhoI site                          | TATAGCGGCCGCCATTCGTAGAATTCCAACTGAGC                     |
| oSJU133                     | oSJU132 | 3' of <i>unc-54</i> 3'UTR and adds ApaI site                          | TATAGGGCCCCTTGCATCGTGCTCATCAATAC                        |
| <i>snb-1p:PaaC:dsRed</i>    |         |                                                                       |                                                         |
| oSJU284                     | oSJU286 | -1 to <i>snb-1</i> and adds PaaC tail                                 | AGAATGGAAGTGGATCTCGAGCCATGTCGTCAAG<br>ATGGTCTTATCCG     |
| oSJU285                     | oSJU286 | +1 to PaaC and adds <i>snb-1</i> tail                                 | AACAGCCGGATAAGACCATCTTGACGACATGGCT<br>CGAGATCCACTTCCATT |
| oSJU286                     | oSJU285 | Stop of Paac and adds <i>gpd-2/gpd-3</i> tail from the plasmid pLR304 | TGGGTCTTTGGCCAATCCCGGCCGCTTAATGGTG<br>GTGATGGTGATGAG    |
| oSJU287                     | oSJU349 | <i>gpd-2/gpd-3</i> and adds PaaC tail                                 | TAGTGCTCATCACCATCACCACCATTAAGCGGCCG<br>GGATTGGCCAAAG    |
| <i>pdfr-1p:IlaC22:dsRed</i> |         |                                                                       |                                                         |
| oSJU459                     | oSJU461 | 5' of <i>pdfr-1</i>                                                   | GACACAAAATTCACTACTTTTCAGC                               |
| oSJU460                     | oSJU350 | Nested to oSJU459                                                     | CACTACTTTTCAGCGACCTTTACTTG                              |
| oSJU461                     | oSJU459 | -1 to <i>pdfr-1</i> and adds IlaC22 tail                              | AGATAGTCATAAGGCATCCGCGGGCCATGATATG<br>AGTCAGTGATGAAGTTC |
| oSJU462                     | oSJU10  | +1 to IlaC22 and adds <i>pdfr-1</i> tail                              | TTTCAGAACTTCATCACTGACTCATATCATGGCC<br>CGCGGATGCCTTATG   |
| <i>hlh-17p:IlaC22:dsRed</i> |         |                                                                       |                                                         |
| oSJU435                     | oSJU437 | 5' of <i>hlh-17</i>                                                   | GACACATTTTCGATTGACATATAG                                |
| oSJU436                     | oSJU350 | Nested to oSJU435                                                     | GATTGACATATAGACACTTTGAAG                                |
| oSJU437                     | oSJU435 | -1 to <i>hlh-17</i> and adds IlaC22 tail                              | AGATAGTCATAAGGCATCCGCGGGCCATCATTGTA<br>ACGACAACCTATTTTC |
| oSJU438                     | oSJU10  | +1 to IlaC22 and adds <i>hlh-17</i> tail                              | TTTTCGGGAAATAGTTGTCGTTACAATGATGGCCC<br>GCGGATGCCTTATG   |
| <i>hsp-16.2p:flp-13</i>     |         |                                                                       |                                                         |

|                                       |         |                                                           |                                                         |
|---------------------------------------|---------|-----------------------------------------------------------|---------------------------------------------------------|
| oSJU18                                | oSJU489 | -363 to <i>hsp-16.2</i>                                   | GAAGTTTTTTAGATGCACTAG                                   |
| oSJU19                                | oSJU492 | Nested to oSJU18                                          | GTTTTTTAGATGCACTAGAAC                                   |
| oSJU489                               | oSJU18  | -1 to <i>hsp-16.2</i> and adds <i>flp-13</i> tail         | ATAGTGAGCAGTGACGTCATCATGATTATAGTTG<br>AAGATTTCTAATTC    |
| oSJU490                               | oSJU491 | +1 to <i>flp-13</i> and adds <i>hsp-16.2</i> tail         | AAATTAGAAATCTTCAAACCTATAATCATGATGACG<br>TCACTGCTCACTATC |
| oSJU491                               | oSJU489 | 3' of <i>flp-13</i>                                       | CTGTTTAGTCGTTTTCAAACCG                                  |
| oSJU492                               | oSJU19  | Nested to oSJU491                                         | GTTTTCAAACCGGTATTTCAATG                                 |
| <i>hsp-16.2p:flp-24</i>               |         |                                                           |                                                         |
| oSJU517                               | oSJU18  | -1 to <i>hsp-16.2</i> and adds <i>flp-24</i> tail         | GATGATGGACGATGTGCGCGACGACAACATGATT<br>ATAGTTTGAAGATTC   |
| oSJU518                               | oSJU519 | +1 to <i>flp-24</i> and adds <i>hsp-16.2</i> tail         | TGAAATTAGAAATCTTCAAACCTATAATCATGTTGTC<br>GTCGCGCACATCG  |
| oSJU519                               | oSJU518 | 3' of <i>flp-24</i>                                       | GTTGCTCCAATGCTTATCTACAC                                 |
| oSJU520                               | oSJU19  | Nested to oSJU519                                         | CAATGCTTATCTACACTGCAATTAC                               |
| <i>hsp-16.2p:pdf-1</i>                |         |                                                           |                                                         |
| oSJU499                               | oSJU18  | -1 to <i>hsp-16.2</i> and adds <i>pdf-1</i> tail          | AATCATTGAAATGATGAATCTGTTCATCATGATTAT<br>AGTTTGAAGATTC   |
| oSJU450                               | oSJU519 | +1 to <i>pdf-1</i> and adds <i>hsp-16.2</i> tail          | TTAGAAATCTTCAAACCTATAATCATGATGAACAGA<br>TTCATCATTTCAATG |
| oSJU501                               | oSJU518 | 3' of <i>pdf-1</i>                                        | GAAAAGTAATGTAACCTAAAATTTAGTAG                           |
| oSJU504                               | oSJU19  | Nested to oSJU501                                         | CACATTCTCAATTTAATATTGCAACTTAC                           |
| <i>twk-16p:kin-2(Sense)-RNAi</i>      |         |                                                           |                                                         |
| oSJU528                               | oSJU52  | -1 to <i>twk-16</i> and adds <i>kin-2</i> sense tail      | AGATAGTCATAAGGCATCCGCGGGCCATTGTGGT<br>ATCTGGAAGATGGATT  |
| oSJU529                               | oSJU530 | +4620 to <i>kin-2a</i> and adds <i>twk-16</i> tail        | TTTGCAATCCATCTTCCAGATACCACAATGGCCCG<br>CGGATGCCTTATGAC  |
| oSJU530                               | oSJU529 | +5594 to <i>kin-2a</i>                                    | GAAATAGTCCGACATTCCAAGATG                                |
| oSJU531                               | oSJU53  | Nested to oSJU530                                         | GTCCGACATTCCAAGATGTCCG                                  |
| <i>twk-16p:kin-2(anti-sense)-RNAi</i> |         |                                                           |                                                         |
| oSJU532                               | oSJU52  | -1 to <i>twk-16</i> and adds <i>kin-2</i> anti-sense tail | ATCTTGGAATGTCGGACTATTTGCGATTGTGGTAT<br>CTGGAAGATGGATTG  |
| oSJU533                               | oSJU534 | +5594 to <i>kin-2a</i> and adds <i>twk-16</i> tail        | TGCAATCCATCTTCCAGATACCACAATGCGAAATA<br>GTCCGACATTCCAAG  |
| oSJU534                               | oSJU533 | +4620 to <i>kin-2a</i>                                    | GAGGAAATCCGGACGCTGCTG                                   |

|                |               |                          |                              |
|----------------|---------------|--------------------------|------------------------------|
| <b>oSJU535</b> | <b>oSJU53</b> | <b>Nested to oSJU534</b> | <b>GAAATCCGGACGCTGCTGATG</b> |
|----------------|---------------|--------------------------|------------------------------|
