# Supplementary material
Source: publisher figshare collection journal article supplement (https://gsajournals.figshare.com/articles/dataset/_/8847728)
Supplement: Supplementary file 2 [file 1]

**Table S2: Extrachromosomal arrays created during this study.****Note: All mixes were supplemented with New England Biolabs 1kb ladder © to 150ng/ul**

| Strain Name | Array Name      | Plasmid or PCR-fusion construct                                                                               | Concentration (ng/ul) |
|-------------|-----------------|---------------------------------------------------------------------------------------------------------------|-----------------------|
| SJU21       | <i>stjEx12</i>  | pPD118.33 ( <i>myo-2p:gfp</i> )<br><i>twk-16p::llaC22:dsRed</i>                                               | 5                     |
| SJU22       | <i>stjEx13</i>  |                                                                                                               | 50                    |
| SJU26       | <i>stjEx17</i>  |                                                                                                               |                       |
| SJU36       | <i>stjEx24</i>  | pCFJ90 ( <i>myo-2p:mCherry</i> )<br><i>twk-16p::llaC22:dsRed</i>                                              | 5                     |
| SJU38       | <i>stjEx28</i>  |                                                                                                               | 50                    |
| SJU86       | <i>stjEx70</i>  | pPD118.33 ( <i>myo-2p:gfp</i> )<br><i>twk-16p::llaC22:dsRed</i>                                               | 5                     |
| SJU87       | <i>stjEx71</i>  |                                                                                                               | 50                    |
| SJU88       | <i>stjEx72</i>  |                                                                                                               |                       |
| SJU98       | <i>stjEx78</i>  | pCFJ90<br><i>unc-17p:epac1-camps</i><br><i>unc-17p::llaC22:dsRed</i>                                          | 5                     |
|             |                 |                                                                                                               | 25                    |
|             |                 |                                                                                                               | 25                    |
| SJU129      | <i>stjEx98</i>  | pPD118.33 ( <i>myo-2p:gfp</i> )<br><i>snb-1p:PaaC:dsRed</i>                                                   | 5                     |
| SJU131      | <i>stjEx100</i> |                                                                                                               | 50                    |
| SJU167      | <i>stjEx116</i> | pRF4( <i>rol-6(+)</i> )<br><i>twk-16p:epac1-camps</i>                                                         | 50                    |
|             |                 |                                                                                                               | 50                    |
| SJU179      | <i>stjEx123</i> | <i>twk-16p:gfp</i><br><i>pdf-1p::llaC22:dsRed</i>                                                             | 50                    |
| SJU180      | <i>stjEx124</i> |                                                                                                               | 50                    |
| SJU181      | <i>stjEx124</i> |                                                                                                               |                       |
| SJU182      | <i>stjEx126</i> | <i>twk-16p:gfp</i><br><i>hlh-17p::llaC22:dsRed</i>                                                            | 50                    |
| SJU183      | <i>stjEx127</i> |                                                                                                               | 50                    |
| SJU184      | <i>stjEx128</i> |                                                                                                               |                       |
| SJU213      | <i>stjEx149</i> | pCFJ104( <i>myo-3p:mCherry</i> )<br><i>hsp-16.2p:flp-13</i>                                                   | 50                    |
| SJU214      | <i>stjEx150</i> |                                                                                                               | 50                    |
| SJU215      | <i>stjEx151</i> |                                                                                                               |                       |
| SJU216      | <i>stjEx152</i> | pCFJ104( <i>myo-3p:mCherry</i> )<br><i>hsp-16.2p:pdf-1</i>                                                    | 50                    |
| SJU217      | <i>stjEx153</i> |                                                                                                               | 50                    |
| SJU218      | <i>stjEx154</i> |                                                                                                               |                       |
| SJU219      | <i>stjEx155</i> | pCFJ104( <i>myo-3p:mCherry</i> )<br><i>hsp-16.2p:flp-24</i>                                                   | 50                    |
| SJU220      | <i>stjEx156</i> |                                                                                                               | 50                    |
| SJU221      | <i>stjEx157</i> |                                                                                                               |                       |
| SJU237      | <i>stjEx163</i> | pCFJ90 ( <i>myo-2p:mCherry</i> )<br><i>twk-16p:kin-2(sense)-RNAi</i><br><i>twk-16p:kin-2(anti-sense)-RNAi</i> | 5                     |
| SJU239      | <i>stjEx165</i> |                                                                                                               | 25                    |
| SJU240      | <i>stjEx166</i> |                                                                                                               | 25                    |
